# Supplementary material
Source: MDPI journal article supplement (https://www.mdpi.com/2073-4441/10/3/310)
Supplement: s1 [file s1]

Article

Improving the distillate prediction of a Membrane Distillation unit in a Trigeneration scheme by using Artificial Neural Networks

Luis Acevedo 1, *, Javier Uche 2,*, Alejandro Del-Amo 3

1 Research Centre for Energy Resources and Consumption (CIRCE), Zaragoza, Spain; lacevedo@fcirce.es

2 Zaragoza University (UNIZAR), Zaragoza, Spain; javiuche@unizar.es

3 ABORA SOLAR Company, Zaragoza, Spain; adelamo@abora-solar.com

***** Correspondence: lacevedo@fcirce.es; Tel.: +34- 876-555-512

Supplementary info.

ANN model with 15 neurons and Tanh activation function in the hidden layer

Equations below include in detail the ANN model parameters for a PGMD characterized by 15 neurons and Tanh as the activating function in the hidden layer.

|  | (S1) |
| --- | --- |
|  | (S2) |
|  | (S3) |

ANN model with 10 neurons and Log-Sigmoid activation function in the hidden layer

Equations below include in detail the ANN model parameters for a PGMD consisting on 10 neurons and Log-Sigmoid as activating function in the hidden layer.

|  | (S4) |
| --- | --- |
|  | (S5) |
|  | (S6) |
|  | (S7) |

© 2018 by the authors. Submitted for possible open access publication under the
terms and conditions of the Creative Commons Attribution (CC BY) license (<http://creativecommons.org/licenses/by/4.0/>).
